# Supplementary material
Source: MDPI journal article supplement (https://www.mdpi.com/2073-4344/13/1/201)
Supplement: s1 [file s1]

# Fabrication and Photocatalytic Activity of Single Crystalline TiO<sub>2</sub> Hierarchically Structured Microspheres

Haisheng Huang <sup>1,2</sup>, Qi Kong <sup>1,2</sup>, Xin Yue <sup>1,2</sup>, Kunlei Wang <sup>3</sup>, Zhishun Wei <sup>1,2,4,\*</sup> and Ying Chang <sup>1,2,4,\*</sup>

<sup>1</sup> Hubei Provincial Key Laboratory of Green Materials for Light Industry, New Materials and Green Manufacturing Talent Introduction and Innovation Demonstration Base, Hubei University of Technology, Wuhan 430068, China

<sup>2</sup> School of Materials and Chemical Engineering, Hubei University of Technology, Wuhan 430068, China

<sup>3</sup> Institute for Catalysis, Hokkaido University, Sapporo 001-0021, Japan

<sup>4</sup> Hubei Longzhong Laboratory, Xiangyang 441000, China

\* Correspondence: wei.zhishun@hbut.edu.cn (Z.W.); cy0025@hbut.edu.cn (Y.C.)

**Table S1.** Comparison of TiO<sub>2</sub> photocatalytic activity in different literatures.

| Ti Source                         | Morphology Regulator                            | Morphology         | Contaminant                    | BET(m <sup>2</sup> /g) | Degradation Rate(%) | Cite |
|-----------------------------------|-------------------------------------------------|--------------------|--------------------------------|------------------------|---------------------|------|
| TiF <sub>4</sub>                  | HF                                              | Particle           | \                              | \                      | \                   | [18] |
| Titanium(IV) isopropoxide         | Diethylenetriamine (DETA)                       | Microsphere        | Methylene Blue (10.0 mg/L)     | 93.5                   | ~99.0               | [38] |
| Ti powder                         | HF+H <sub>2</sub> O <sub>2</sub>                | Particle           | MB                             | \                      | 82.5                | [22] |
| P25(TiO <sub>2</sub> )            | HF+H <sub>2</sub> O <sub>2</sub>                | Particle           | MB (25.0 mg/L)                 | 6.1                    | ~99.0               | [21] |
| Tetrabutyl titanate(TBT)          | Acetic acid+NH <sub>4</sub> F                   | Particle           | MB (6.4 mg/L)                  | 30.0                   | 97.5                | [33] |
| Ti foil                           | HF                                              | Microsphere        | Dimethyl phthalate             | \                      | 94.3                | [27] |
| Ti(SO <sub>4</sub> ) <sub>2</sub> | NH <sub>4</sub> F+H <sub>2</sub> O <sub>2</sub> | Hollow microsphere | Brilliant red X-3B (61.5 mg/L) | \                      | \                   | [41] |
| TBT                               | HF                                              | Particle           | Phenol (5.0 mg/L)              | \                      | \                   | [42] |

**Table S2.** Crystallinity of different sample.

| Sample | Calculated Area (total) | Area Peak1 | Area Peak2 | Area Peak3 | Relative Crystallinity |
|--------|-------------------------|------------|------------|------------|------------------------|
| T1     | 460.24                  | 299.55     | 60.04      | 100.65     | 46%                    |
| T2     | 660.25                  | 484.85     | 71.83      | 103.57     | 66%                    |
| T3     | 751.82                  | 566.14     | 76.69      | 108.99     | 75%                    |
| T4     | 691.92                  | 515.00     | 59.58      | 117.34     | 69%                    |

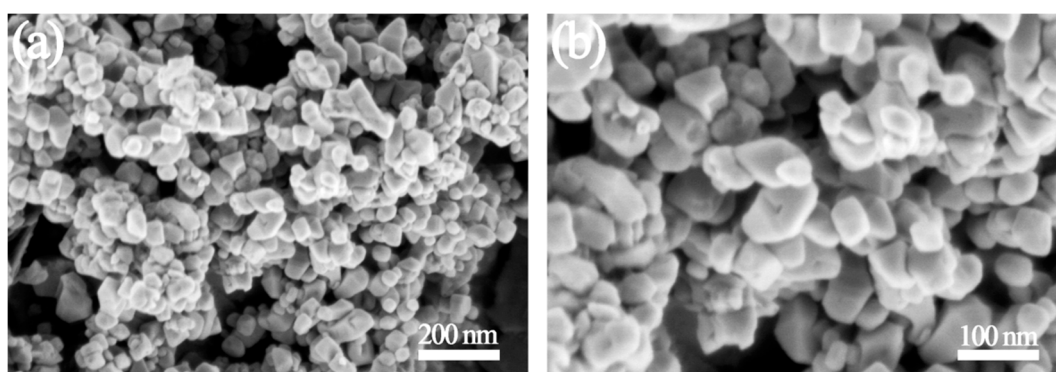

Figure S1. Higher magnification SEM image of T1.

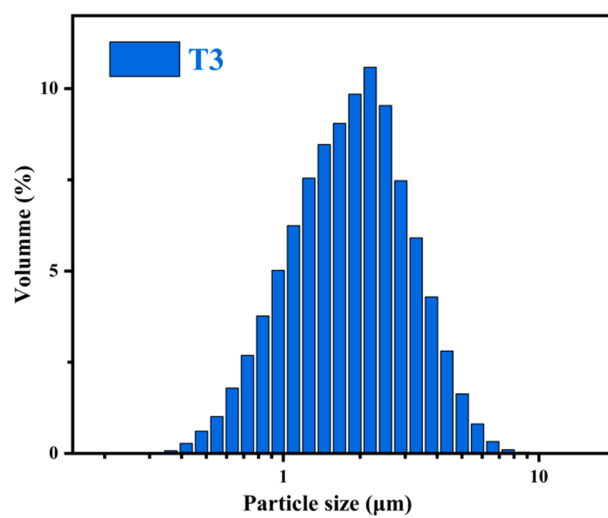

Figure S2. Particle size of microspheres.

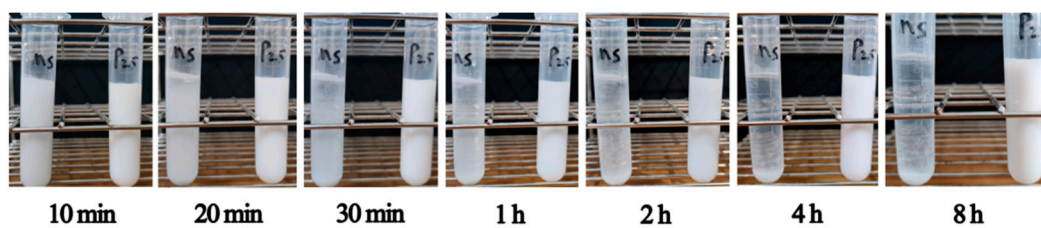

Figure S3. Precipitation time of microspheres (MS) and P25.
